# Supplementary material
Source: PubMed Central journal article supplement (PMC3499075)
Supplement: supp_kfs182_toxsci-12-0300-File011.pdf [file supp_kfs182_toxsci-12-0300-File011.pdf]

**Table 2S**

**Comparison of BUN concentrations, urinary RPA-1 concentrations, and kidney histopathological severity in individual F344 rat following dietary exposure to melamine and cyanuric acid**

| Concentration of melamine and cyanuric acid in diet (ppm) | 0                                      |                                        | 120                                    |                                        | 180                                      |                                          | 240                                       |                                             |
|-----------------------------------------------------------|----------------------------------------|----------------------------------------|----------------------------------------|----------------------------------------|------------------------------------------|------------------------------------------|-------------------------------------------|---------------------------------------------|
|                                                           | Males                                  | Females                                | Males                                  | Females                                | Males                                    | Females                                  | Males                                     | Females                                     |
| Sex                                                       |                                        |                                        |                                        |                                        |                                          |                                          |                                           |                                             |
| Rat ID                                                    | 1, 2, 3, 4, 5, 6, 7, 8                 | 1, 2, 3, 4, 5, 6, 7, 8                 | 1, 2, 3, 4, 5, 6, 7, 8                 | 1, 2, 3, 4, 5, 6, 7, 8                 | 1, 2, 3, 4, 5, 6, 7, 8                   | 1, 2, 3, 4, 5, 6, 7, 8                   | 1, 2, 3, 4, 5, 6, 7, 8                    | 1, 2, 3, 4, 5, 6, 7, 8                      |
| Dilatation, Renal Tubule <sup>b</sup>                     | 0 <sup>a</sup> , 0, 0, 0, 0, 0, 0, 0   | 0, 0, 0, 0, 0, 0, 0, 0                 | 0, 0, 0, 0, 0, 0, 0, 0                 | 0, 0, 0, 0, 0, 0, 0, 0                 | 3, 3, 1, 2, 0, 0, 1, 2                   | 0, 2, 2, 0, 0, 0, 0, 0                   | 4, 4, 4, 4, 4, 4, 4, 4                    | 3, 4, 3, 4, 4, 4, 4, 4                      |
| Fibrosis <sup>b</sup>                                     | 0, 0, 0, 0, 0, 0, 0, 0                 | 0, 0, 0, 0, 0, 0, 0, 0                 | 0, 0, 0, 0, 0, 0, 0, 0                 | 0, 0, 0, 0, 0, 0, 0, 0                 | 0, 2, 0, 0, 0, 0, 0, 0                   | 0, 0, 0, 0, 0, 0, 0, 0                   | 0, 0, 0, 0, 2, 4, 3, 4                    | 0, 0, 0, 0, 2, 2, 3, 3                      |
| Regeneration, renal tubule <sup>b</sup>                   | 1, 1, 1, 0, 1, 1, 1, 1                 | 0, 1, 1, 1, 0, 0, 0, 0                 | 1, 0, 1, 1, 1, 1, 1, 2                 | 1, 1, 0, 1, 0, 0, 0, 1                 | 4, 4, 2, 3, 1, 1, 2, 3                   | 2, 3, 3, 1, 2, 2, 1, 1                   | 4, 4, 4, 4, 4, 4, 4, 4                    | 3, 4, 3, 4, 4, 4, 4, 4                      |
| Necrosis, Renal Tubule, Epithelium <sup>b</sup>           | 0, 0, 0, 0, 0, 0, 0, 0                 | 0, 0, 0, 0, 0, 0, 0, 0                 | 0, 0, 0, 0, 0, 0, 0, 0                 | 0, 0, 0, 0, 0, 0, 0, 0                 | 0, 1, 0, 0, 0, 0, 1, 0                   | 0, 0, 0, 0, 0, 0, 0, 0                   | 2, 2, 2, 2, 2, 3, 2, 3                    | 1, 2, 2, 2, 2, 2, 2, 2                      |
| Infiltration cellular, lymphocyte                         | 0, 0, 0, 0, 0, 0, 0, 0                 | 0, 0, 0, 0, 0, 0, 0, 0                 | 0, 0, 0, 0, 0, 0, 0, 0                 | 0, 0, 0, 0, 0, 0, 0, 0                 | 1, 0, 0, 1, 1, 0, 0, 0                   | 1, 0, 0, 0, 0, 1, 0, 0                   | 2, 0, 0, 0, 0, 2, 0, 2                    | 0, 0, 0, 0, 0, 1, 2, 2                      |
| Hyperplasia, Pelvis, Transitional Epithelium <sup>b</sup> | 0, 0, 0, 0, 0, 0, 0, 0                 | 0, 0, 0, 0, 0, 0, 0, 0                 | 0, 0, 0, 0, 0, 2, 0, 0                 | 0, 0, 0, 0, 0, 0, 0, 0                 | 0, 0, 0, 0, 0, 0, 0, 3                   | 0, 0, 2, 0, 0, 0, 0, 0                   | 3, 2, 2, 3, 1, 1, 0, 1                    | 1, 3, 2, 1, 1, 2, 2, 3                      |
| Blood BUN (mg/dl) <sup>b</sup>                            | 13, 17, 23, 17, 17, 17, 16, 17         | 17, 19, 15, 13, 17, 18, 15, 17         | 13, 13, 13, 12, 17, 17, 13, 16         | 11, 14, 16, 13, 21, 16, 15, 17         | 16, 18, 16, 15, 12, 16, 12, 14           | 11, 10, 10, 13, 16, 12, 17, 15           | 55, 92, 49, 51, 92, 176, 137, 110         | 42, 48, 21, 92, 61, 52, 84, 49              |
| Urinary RPA-1 (µg/mg Cr) <sup>c</sup>                     | 1.9, 1.5, 1.9, 1.6, 2.5, 2.2, 1.7, 2.5 | 1.4, 1.3, 1.4, 1.7, 1.3, 1.4, 1.3, 2.1 | 2.5, 3.3, 7.5, 7.3, 2.5, 2.2, 4.6, 2.4 | 1.1, 1.2, 1.9, 3.1, 1.0, 1.3, 1.2, 1.4 | 20.1, 16.4, 8.9, 110, 8.1, 19, 9.9, 22.1 | 6.1, 23.2, 7.1, 3.0, 4.1, 10.3, 3.4, 5.8 | 7.8, 7.6, 9.9, 13.1, 18.5, 6.6, 14.2, 2.6 | 16.2, 5.8, 50.4, 17.3, 12.4, 10.6, 7.4, 3.9 |

<sup>a</sup>Kidney lesion severity qualified as: 0 = not observed, 1 = minimal, 2 = mild, 3 = moderate, 4 = marked.

<sup>b</sup>Kidney histopathological changes and blood BUN levels were examined at the end of study.

<sup>c</sup>Urinary RPA-1 levels were analyzed for day 28 for control and low dose groups (120 ppm and 180 ppm). At the highest dose group (240 ppm), the levels of RPA-1 were analyzed for day 14.
